# Supplementary material for: Knowledge, Perception and Preventive Practices of Lassa Fever Among Mothers of Under- Five Children in an Endemic Community in Edo State, Nigeria
Source: Research Square preprint supplement (doi:10.21203/rs.3.rs-5582518/v1), 2025-01-09
Supplement: Supplementary file 1 [file 186e321d07b92d5c49c284c2.pdf]

## **QUESTIONNAIRE**

### **Study Title: Knowledge, Perception, and Preventive Practices of Lassa Fever Among Mothers of Under-Five Children in an Endemic Community in Edo State, Nigeria**

#### **Instructions for Completing the Questionnaire**

Dear Participant,

Thank you for agreeing to participate in this study on the knowledge, perception, and preventive practices of Lassa fever. The information you provide will help us better understand and address public health challenges in your community.

Please follow these instructions while completing the questionnaire:

1. Read each question carefully before answering.
2. For questions with multiple-choice answers, select the option(s) that best represent your response by marking the corresponding box ([ ]).
3. For questions requiring written answers, provide clear and concise responses in the space provided.
4. If you do not understand a question or need clarification, feel free to ask the interviewer.
5. There are no right or wrong answers; please respond honestly based on your knowledge and practices.
6. Your responses will remain confidential and will only be used for research purposes.

Estimated Time to Complete the Questionnaire: 15–20 minutes

Thank you for your time and cooperation.

## **SECTION A: Demographic Information**

1. Age (years):

☐ 18–28

☐ 29–39

☐ 40–49

2. Religion:

☐ Christian

☐ Muslim

☐ Other (specify): \_\_\_\_\_

3. Marital Status:

☐ Married

☐ Engaged

☐ Single

4. Ethnicity:

☐ Esan

☐ Bini

☐ Etsako

☐ Yoruba

☐ Hausa

☐ Igbo

☐ Others (specify): \_\_\_\_\_

5. Level of Education:

☐ No formal education

☐ Primary

☐ Secondary

☐ Tertiary

6. Occupation:

☐ Trader

☐ Teacher

☐ Doctor

☐ Nurse

☐ Other (specify): \_\_\_\_\_

7. Parity (Number of children):

☐ 1

☐ 2

☐ 3

☐ 4 or more

## **SECTION B: Knowledge of Lassa Fever**

8. Have you heard about Lassa fever? ☐ Yes ☐ No

9. What is your primary source of information about Lassa fever?

☐ Family and Friends

☐ School authorities

☐ Radio

☐ Television

☐ Newspaper

☐ Social Media

☐ Health Workers

☐ Other (specify): \_\_\_\_\_

10. Which of the following are symptoms of Lassa fever? (Select all that apply)

☐ Fever

☐ Vomiting

☐ Malaise

☐ Cough

☐ Abdominal pain

☐ Sore throat

☐ Bleeding

☐ Diarrhea

11. Do you know someone who has had Lassa fever? ☐ Yes ☐ No

12. Do you know that Lassa fever can mimic other endemic illnesses? ☐ Yes ☐ No

13. Do you know that Lassa fever is severe but has a good prognosis when diagnosed early? ☐  
Yes ☐ No

14. Do you know that Lassa fever is a cause of under-five deaths? ☐ Yes ☐ No

15. Do you know that Lassa fever can affect children of different socioeconomic statuses? ☐  
Yes ☐ No

#### **SECTION C: Preventive Practices Against Lassa Fever**

16. Which of the following preventive practices do you follow? (Select all that apply)

☐ Avoid bush burning

☐ Properly store food to prevent contamination

☐ Cook food properly

☐ Wash hands before eating

☐ Avoid consuming rats

☐ Maintain proper drainage systems around the house

☐ Avoid contact with infected persons

Thank you for participating!
